# Supplementary material for: Solvent effects in ionic liquids: empirical linear energy–density relationships
Source: Royal Society of Chemistry journal article supplement (doi:10.1039/c2cp40619e), 2012-01-01
Supplement: c2cp40619e.pdf [file c2cp40619e.pdf]

## *Electronic Supplementary Information*

# Solvent Effects in Ionic Liquids: Linear Energy-Density Relationships.

A. Cerda-Monje,<sup>\*a</sup> A. Aizman<sup>b</sup>, R. A. Tapia<sup>c</sup>, C. Chiappe<sup>d</sup> and R. Contreras<sup>a</sup>

<sup>a</sup> Departamento de Química, Facultad de Ciencias, Universidad de Chile, Las Palmeras#3425, Ñuñoa, Santiago, Casilla 653-SCL, Chile. Fax: 562 2713888; Tel: 56 29787272; E-mail: apcerda@ug.uchile.cl; rcontrer@uchile.cl

<sup>b</sup> Departamento de Química, Universidad Técnica Federico Santa María, Casilla 110-V, Valparaíso, Chile. Fax: 563 2265 4325; Tel: 563 2265 4782; E-mail: arie.aizman@usm.cl

<sup>c</sup> Facultad de Química, Pontificia Universidad Católica de Chile, 702843 Santiago, Chile. Fax: 56 2686 4744; Tel: 56 2686 4429; E-mail: rtapia@uc.cl

<sup>d</sup> Dipartimento di Chimica e Chimica Industriale, Università di Pisa, Via Bonanno Pisano 33, 56100, Pisa, Italy. E-mail: cinziac@farm.unipi.it

|                                                                                                                                                                                                     | Page |
|-----------------------------------------------------------------------------------------------------------------------------------------------------------------------------------------------------|------|
| I. Cross validation analysis .....                                                                                                                                                                  | S2   |
| II. The IRC- electrophilicity and IRC-nucleophilicity profiles for the isolated TS for the reaction acrolein + CP. ....                                                                             | S3   |
| III. Cartesian coordinates, energy and number of imaginary frequencies for the cations-anions ion pair structures, optimized at the B3LYP/6-311+G(d,p) level of theory .....                        | S4   |
| Cartesian coordinates, energy and number of imaginary frequencies for the TS---Cation/Anion complexes structures for reaction acrolein-CP, optimized at the B3LYP/6-311+G(d,p) level of theory..... | S14  |

**Table S1.** Cross validation analysis.

| Eq. 11 Acrolein-CP |                                       | Statistical parameters for          |                |                |                |                |                        |      |          |
|--------------------|---------------------------------------|-------------------------------------|----------------|----------------|----------------|----------------|------------------------|------|----------|
|                    |                                       | Multiparameter regression constants |                |                |                |                | multiparameter fitting |      |          |
| Run                | Excluded                              | a <sub>1</sub>                      | a <sub>2</sub> | a <sub>3</sub> | a <sub>4</sub> | a <sub>5</sub> | R <sup>2</sup>         | F    | P        |
| 1                  | HbimN(Tf) <sub>2</sub>                | -2.97                               | -4.96          | 2.71           | -0.22          | 0.05           | 0.984                  | 59.6 | < 0.0008 |
| 2                  | MepipTFA                              | -2.43                               | -11.34         | 8.97           | -0.5           | 0.002          | 0.968                  | 29.9 | < 0.0031 |
| 3                  | Bmim BF <sub>4</sub>                  | -4.16                               | -11.31         | -214           | -0.49          | 1.71           | 0.975                  | 39.6 | < 0.0018 |
| 4                  | Bmim PF <sub>6</sub>                  | -4.55                               | -9.59          | 23.4           | -0.28          | -0.45          | 0.939                  | 15.3 | < 0.011  |
| 5                  | Emim N(Tf) <sub>2</sub>               | -4.06                               | -9.37          | -9.44          | -0.27          | -0.0004        | 0.87                   | 8.6  | < 0.030  |
| 6                  | Bmim Otf                              | -4.05                               | -9.8           | -10.07         | -0.34          | -0.04          | 0.897                  | 8.7  | < 0.030  |
| 7                  | Bmim N(Tf) <sub>2</sub>               | -4                                  | -9.44          | -11.66         | -0.29          | 0.02           | 0.894                  | 8.4  | < 0.031  |
| 8                  | Omim N(Tf) <sub>2</sub>               | -4.03                               | -9.37          | -10.41         | -0.28          | 0.009          | 0.89                   | 8.1  | < 0.033  |
| 9                  | Bmpy N(Tf) <sub>2</sub>               | -5.43                               | -9.44          | -2.14          | 0.041          | 0.011          | 0.919                  | 11.3 | < 0.019  |
| 10                 | Bm <sub>2</sub> im N(Tf) <sub>2</sub> | -4.16                               | -10.04         | -17.28         | -0.3           | 0.06           | 0.91                   | 10.2 | < 0.022  |

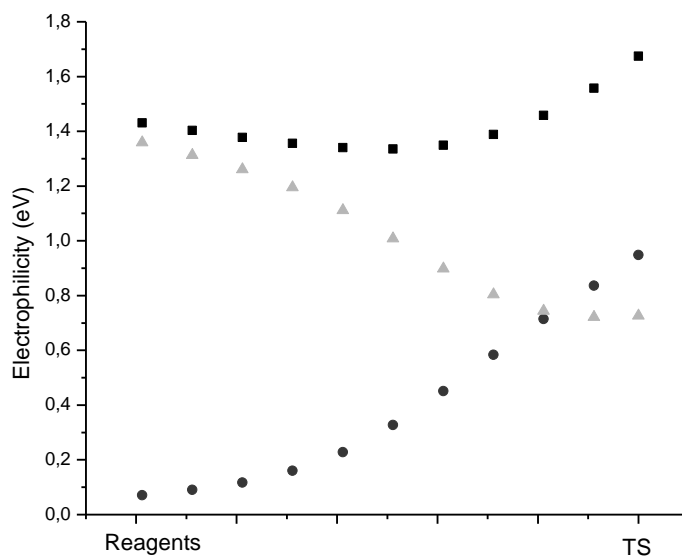

**Fig F1.** The IRC- electrophilicity profile for the isolated TS for the reaction acrolein + CP. Global electrophilicity (filled squares); Dienophile moiety electrophilicity (filled triangles); Diene moiety electrophilicity (filled circles).

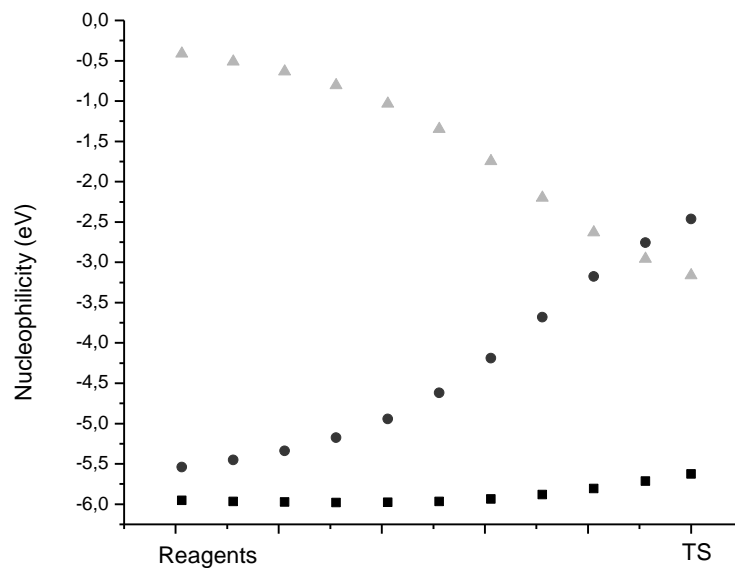

**Fig F2.** The IRC- nucleophilicity profile for the isolated TS for the reaction acrolein + CP. Global nucleophilicity (filled squares); Dienophile moiety nucleophilicity (filled triangles); Diene moiety nucleophilicity (filled circles).

**Cartesian coordinates, energy and number of imaginary frequencies for the cations-anions ion pair structures, optimized at the B3LYP/6-311+G(d,p) level of theory**

**Bm<sub>2</sub>im[NTf<sub>2</sub>]**

| Center Number | Atomic Number | Atomic Type | Coordinates (Angstroms) |           |           |
|---------------|---------------|-------------|-------------------------|-----------|-----------|
|               |               |             | X                       | Y         | Z         |
| 1             | 6             | 0           | -0.038735               | -0.548928 | -0.186969 |
| 2             | 6             | 0           | -0.136485               | -0.252310 | 2.016921  |
| 3             | 6             | 0           | 1.119526                | -0.661674 | 1.711299  |
| 4             | 7             | 0           | 1.164668                | -0.835847 | 0.341006  |
| 5             | 1             | 0           | -0.544089               | 0.030373  | 2.972550  |
| 6             | 1             | 0           | 1.980814                | -0.783348 | 2.352694  |
| 7             | 6             | 0           | 2.363328                | -1.249178 | -0.401498 |
| 8             | 1             | 0           | 2.461036                | -0.648823 | -1.305310 |
| 9             | 1             | 0           | 3.226492                | -1.073625 | 0.239914  |
| 10            | 1             | 0           | 2.296243                | -2.307034 | -0.662440 |
| 11            | 7             | 0           | -0.846145               | -0.182957 | 0.828506  |
| 12            | 6             | 0           | -2.263708               | 0.202544  | 0.736195  |
| 13            | 6             | 0           | -3.216530               | -0.982914 | 0.913905  |
| 14            | 1             | 0           | -2.421028               | 0.697277  | -0.223574 |
| 15            | 1             | 0           | -2.430148               | 0.952600  | 1.511369  |
| 16            | 6             | 0           | -4.686844               | -0.550491 | 0.865903  |
| 17            | 1             | 0           | -3.022494               | -1.728124 | 0.133469  |
| 18            | 1             | 0           | -3.003578               | -1.471297 | 1.870659  |
| 19            | 6             | 0           | -5.654520               | -1.723402 | 1.044801  |
| 20            | 1             | 0           | -4.869074               | 0.196129  | 1.647396  |
| 21            | 1             | 0           | -4.889951               | -0.050610 | -0.088908 |
| 22            | 1             | 0           | -6.692395               | -1.384262 | 1.010084  |
| 23            | 1             | 0           | -5.522821               | -2.471431 | 0.257167  |
| 24            | 1             | 0           | -5.499606               | -2.221228 | 2.006327  |
| 25            | 6             | 0           | -0.381323               | -0.597210 | -1.634223 |
| 26            | 1             | 0           | 0.069869                | -1.471809 | -2.106042 |
| 27            | 1             | 0           | -1.458734               | -0.656828 | -1.780218 |
| 28            | 1             | 0           | -0.014924               | 0.292574  | -2.156844 |
| 29            | 8             | 0           | 1.016023                | 0.543130  | 4.777396  |
| 30            | 16            | 0           | 2.404706                | 1.016364  | 4.745976  |
| 31            | 8             | 0           | 2.671109                | 2.402277  | 4.382782  |
| 32            | 7             | 0           | 3.245089                | -0.098552 | 3.936044  |
| 33            | 16            | 0           | 4.671611                | 0.096144  | 3.198252  |
| 34            | 8             | 0           | 5.458058                | 1.275399  | 3.526747  |
| 35            | 8             | 0           | 4.515125                | -0.285170 | 1.784334  |
| 36            | 6             | 0           | 5.605246                | -1.370934 | 3.941492  |
| 37            | 9             | 0           | 6.823600                | -1.435841 | 3.391558  |
| 38            | 9             | 0           | 5.736822                | -1.230739 | 5.261771  |
| 39            | 9             | 0           | 4.966817                | -2.521993 | 3.692339  |
| 40            | 6             | 0           | 2.982141                | 0.846148  | 6.539624  |
| 41            | 9             | 0           | 2.279285                | 1.682854  | 7.312435  |
| 42            | 9             | 0           | 4.277473                | 1.146405  | 6.644970  |
| 43            | 9             | 0           | 2.791292                | -0.402471 | 6.978869  |

Total Energy (a.u.) = **-2290.33925921**; NIMAG = **0**

### Bmim[BF<sub>4</sub>]

| Center<br>Number | Atomic<br>Number | Atomic<br>Type | Coordinates (Angstroms) |           |           |
|------------------|------------------|----------------|-------------------------|-----------|-----------|
|                  |                  |                | X                       | Y         | Z         |
| 1                | 6                | 0              | -0.064628               | 0.535210  | -0.007985 |
| 2                | 6                | 0              | 0.205413                | -0.270580 | 2.026681  |
| 3                | 6                | 0              | 1.433514                | -0.168418 | 1.450836  |
| 4                | 7                | 0              | 1.242272                | 0.336727  | 0.177274  |
| 5                | 1                | 0              | -0.524017               | 0.875139  | -0.921646 |
| 6                | 1                | 0              | -0.085279               | -0.625433 | 2.999770  |
| 7                | 1                | 0              | 2.410806                | -0.412951 | 1.828996  |
| 8                | 6                | 0              | 2.271690                | 0.558146  | -0.845723 |
| 9                | 1                | 0              | 2.796519                | 1.494881  | -0.652850 |
| 10               | 1                | 0              | 2.973961                | -0.274073 | -0.819892 |
| 11               | 1                | 0              | 1.780357                | 0.580055  | -1.817405 |
| 12               | 7                | 0              | -0.717237               | 0.178663  | 1.099154  |
| 13               | 6                | 0              | -2.190371               | 0.121498  | 1.217257  |
| 14               | 6                | 0              | -2.710284               | -1.317479 | 1.216303  |
| 15               | 1                | 0              | -2.583884               | 0.658820  | 0.355107  |
| 16               | 1                | 0              | -2.469398               | 0.656935  | 2.128607  |
| 17               | 6                | 0              | -4.242743               | -1.357017 | 1.224390  |
| 18               | 1                | 0              | -2.326471               | -1.819330 | 0.324244  |
| 19               | 1                | 0              | -2.322473               | -1.853837 | 2.091198  |
| 20               | 6                | 0              | -4.790436               | -2.786974 | 1.233538  |
| 21               | 1                | 0              | -4.624817               | -0.812110 | 2.097113  |
| 22               | 1                | 0              | -4.614191               | -0.830535 | 0.338821  |
| 23               | 1                | 0              | -5.883364               | -2.789367 | 1.226917  |
| 24               | 1                | 0              | -4.450021               | -3.341534 | 0.354885  |
| 25               | 1                | 0              | -4.461566               | -3.333902 | 2.123002  |
| 26               | 9                | 0              | -2.222885               | 0.100522  | -1.984534 |
| 27               | 5                | 0              | -1.253591               | -0.754269 | -2.604929 |
| 28               | 9                | 0              | -0.835304               | -1.697496 | -1.625560 |
| 29               | 9                | 0              | -1.763781               | -1.367921 | -3.724211 |
| 30               | 9                | 0              | -0.123528               | 0.067788  | -2.921381 |

Total Energy (a.u.) = **-848.100391518**; NIMAG = **0**

### Bmim[NTf<sub>2</sub>]

| Center<br>Number | Atomic<br>Number | Atomic<br>Type | Coordinates (Angstroms) |           |           |
|------------------|------------------|----------------|-------------------------|-----------|-----------|
|                  |                  |                | X                       | Y         | Z         |
| 1                | 6                | 0              | 0.023992                | 0.676022  | 0.566774  |
| 2                | 6                | 0              | 0.323827                | -1.066560 | 1.887647  |
| 3                | 6                | 0              | 1.530739                | -0.723523 | 1.361911  |
| 4                | 7                | 0              | 1.322630                | 0.370452  | 0.546069  |
| 5                | 1                | 0              | -0.420026               | 1.475661  | -0.014057 |
| 6                | 1                | 0              | 0.053270                | -1.855124 | 2.567275  |
| 7                | 1                | 0              | 2.504683                | -1.161706 | 1.494214  |
| 8                | 6                | 0              | 2.319360                | 1.012265  | -0.321264 |
| 9                | 1                | 0              | 1.892499                | 1.933816  | -0.710752 |
| 10               | 1                | 0              | 3.215181                | 1.223745  | 0.262199  |
| 11               | 1                | 0              | 2.540553                | 0.347485  | -1.155131 |
| 12               | 7                | 0              | -0.605979               | -0.176664 | 1.380338  |
| 13               | 6                | 0              | -2.061265               | -0.187365 | 1.637767  |
| 14               | 6                | 0              | -2.743416               | -1.447390 | 1.102790  |
| 15               | 1                | 0              | -2.463801               | 0.703779  | 1.153689  |
| 16               | 1                | 0              | -2.206044               | -0.076365 | 2.715865  |
| 17               | 6                | 0              | -4.261572               | -1.396987 | 1.314387  |
| 18               | 1                | 0              | -2.519507               | -1.547216 | 0.037232  |
| 19               | 1                | 0              | -2.333265               | -2.329753 | 1.608520  |
| 20               | 6                | 0              | -4.963842               | -2.652563 | 0.789982  |
| 21               | 1                | 0              | -4.485844               | -1.267319 | 2.380719  |
| 22               | 1                | 0              | -4.665272               | -0.516054 | 0.802548  |
| 23               | 1                | 0              | -6.044722               | -2.588237 | 0.937720  |
| 24               | 1                | 0              | -4.777637               | -2.785970 | -0.278863 |
| 25               | 1                | 0              | -4.610040               | -3.550193 | 1.306670  |
| 26               | 8                | 0              | -2.042298               | -1.277720 | -2.236613 |
| 27               | 16               | 0              | -1.034179               | -0.385006 | -2.804923 |
| 28               | 8                | 0              | 0.326413                | -0.432729 | -2.243780 |
| 29               | 7                | 0              | -1.652026               | 1.087233  | -2.926876 |
| 30               | 16               | 0              | -0.768877               | 2.439553  | -2.879669 |
| 31               | 8                | 0              | 0.190180                | 2.637517  | -3.960359 |
| 32               | 8                | 0              | -0.314849               | 2.773723  | -1.510079 |
| 33               | 6                | 0              | -2.195346               | 3.633991  | -3.203732 |
| 34               | 9                | 0              | -1.698339               | 4.875994  | -3.198117 |
| 35               | 9                | 0              | -2.755185               | 3.398365  | -4.387502 |
| 36               | 9                | 0              | -3.126547               | 3.543194  | -2.250274 |
| 37               | 6                | 0              | -0.845230               | -0.978933 | -4.590299 |
| 38               | 9                | 0              | -0.382768               | -2.236243 | -4.584828 |
| 39               | 9                | 0              | 0.012771                | -0.206870 | -5.254906 |
| 40               | 9                | 0              | -2.024627               | -0.958032 | -5.213084 |

Total Energy (a.u.) = **-2251.01780670**; NIMAG = **0**

## BmimOTf

| Center<br>Number | Atomic<br>Number | Atomic<br>Type | Coordinates (Angstroms) |           |           |
|------------------|------------------|----------------|-------------------------|-----------|-----------|
|                  |                  |                | X                       | Y         | Z         |
| 1                | 6                | 0              | -0.049817               | -0.060147 | -0.028783 |
| 2                | 6                | 0              | -0.053506               | 0.246147  | 2.157127  |
| 3                | 6                | 0              | 1.242874                | 0.164288  | 1.748809  |
| 4                | 7                | 0              | 1.221558                | -0.027489 | 0.378510  |
| 5                | 1                | 0              | -0.371770               | -0.183711 | -1.054171 |
| 6                | 1                | 0              | -0.472122               | 0.398255  | 3.136816  |
| 7                | 1                | 0              | 2.161485                | 0.233040  | 2.305325  |
| 8                | 6                | 0              | 2.375018                | -0.153529 | -0.523670 |
| 9                | 1                | 0              | 3.016055                | 0.721062  | -0.412404 |
| 10               | 1                | 0              | 2.932529                | -1.058414 | -0.280152 |
| 11               | 1                | 0              | 1.995028                | -0.207209 | -1.543812 |
| 12               | 7                | 0              | -0.844288               | 0.108216  | 1.030382  |
| 13               | 6                | 0              | -2.322637               | 0.112888  | 0.961611  |
| 14               | 6                | 0              | -2.926258               | -1.246970 | 1.315455  |
| 15               | 1                | 0              | -2.576176               | 0.393708  | -0.061839 |
| 16               | 1                | 0              | -2.671254               | 0.894682  | 1.640234  |
| 17               | 6                | 0              | -4.456362               | -1.226763 | 1.215263  |
| 18               | 1                | 0              | -2.524612               | -1.998754 | 0.627953  |
| 19               | 1                | 0              | -2.623077               | -1.541116 | 2.327855  |
| 20               | 6                | 0              | -5.086420               | -2.583502 | 1.540929  |
| 21               | 1                | 0              | -4.856670               | -0.464176 | 1.894477  |
| 22               | 1                | 0              | -4.742295               | -0.922449 | 0.203044  |
| 23               | 1                | 0              | -6.175292               | -2.539281 | 1.461479  |
| 24               | 1                | 0              | -4.735077               | -3.356381 | 0.851268  |
| 25               | 1                | 0              | -4.839603               | -2.904835 | 2.557831  |
| 26               | 9                | 0              | -0.279015               | 2.093737  | -4.985629 |
| 27               | 6                | 0              | -1.120825               | 1.903961  | -3.960986 |
| 28               | 9                | 0              | -2.332108               | 2.346317  | -4.324042 |
| 29               | 9                | 0              | -0.694676               | 2.668535  | -2.930709 |
| 30               | 16               | 0              | -1.180236               | 0.089253  | -3.452377 |
| 31               | 8                | 0              | -1.636756               | -0.616460 | -4.644249 |
| 32               | 8                | 0              | -2.111587               | 0.103220  | -2.291278 |
| 33               | 8                | 0              | 0.222220                | -0.175040 | -3.023707 |

Total Energy (a.u.) = **-1385.14613554**; NIMAG = **0**

### Bmim[PF<sub>6</sub>]

| Center<br>Number | Atomic<br>Number | Atomic<br>Type | Coordinates (Angstroms) |           |           |
|------------------|------------------|----------------|-------------------------|-----------|-----------|
|                  |                  |                | X                       | Y         | Z         |
| 1                | 6                | 0              | -0.132952               | 0.653132  | 0.255755  |
| 2                | 6                | 0              | 0.058750                | -0.525763 | 2.109449  |
| 3                | 6                | 0              | 1.303867                | -0.358013 | 1.588855  |
| 4                | 7                | 0              | 1.161941                | 0.383480  | 0.430193  |
| 5                | 1                | 0              | -0.550594               | 1.168130  | -0.593121 |
| 6                | 1                | 0              | -0.268035               | -1.042492 | 2.994682  |
| 7                | 1                | 0              | 2.263255                | -0.701200 | 1.935051  |
| 8                | 6                | 0              | 2.223781                | 0.729501  | -0.522607 |
| 9                | 1                | 0              | 2.896314                | 1.463687  | -0.077635 |
| 10               | 1                | 0              | 2.770257                | -0.175781 | -0.784205 |
| 11               | 1                | 0              | 1.757629                | 1.126875  | -1.421592 |
| 12               | 7                | 0              | -0.826102               | 0.117726  | 1.262051  |
| 13               | 6                | 0              | -2.301391               | 0.096977  | 1.350429  |
| 14               | 6                | 0              | -2.881415               | -1.275748 | 1.005460  |
| 15               | 1                | 0              | -2.662752               | 0.846342  | 0.646651  |
| 16               | 1                | 0              | -2.573310               | 0.412406  | 2.361042  |
| 17               | 6                | 0              | -4.414493               | -1.256173 | 1.016745  |
| 18               | 1                | 0              | -2.521938               | -1.562447 | 0.014254  |
| 19               | 1                | 0              | -2.515543               | -2.022518 | 1.720530  |
| 20               | 6                | 0              | -5.018691               | -2.620191 | 0.672561  |
| 21               | 1                | 0              | -4.774845               | -0.931898 | 2.001391  |
| 22               | 1                | 0              | -4.765086               | -0.511584 | 0.293867  |
| 23               | 1                | 0              | -6.110700               | -2.578138 | 0.679612  |
| 24               | 1                | 0              | -4.703393               | -2.947931 | -0.321598 |
| 25               | 1                | 0              | -4.710139               | -3.385160 | 1.392083  |
| 26               | 9                | 0              | -1.961637               | 0.557818  | -4.121591 |
| 27               | 15               | 0              | -1.103925               | -0.302929 | -3.054975 |
| 28               | 9                | 0              | -0.207245               | 1.064312  | -2.672615 |
| 29               | 9                | 0              | -0.223270               | -1.117160 | -1.896720 |
| 30               | 9                | 0              | -0.007864               | -0.708858 | -4.175421 |
| 31               | 9                | 0              | -2.163389               | 0.143819  | -1.839988 |
| 32               | 9                | 0              | -1.980634               | -1.637021 | -3.332052 |

Total Energy (a.u.) = **-1364.30779436**; NIMAG = **0**



## Bmpy[NTf<sub>2</sub>]

| Center<br>Number | Atomic<br>Number | Atomic<br>Type | Coordinates (Angstroms) |           |           |
|------------------|------------------|----------------|-------------------------|-----------|-----------|
|                  |                  |                | X                       | Y         | Z         |
| 1                | 6                | 0              | -0.324799               | 0.001883  | 0.011239  |
| 2                | 6                | 0              | -0.556657               | -0.050303 | 1.528737  |
| 3                | 6                | 0              | 0.862900                | -0.115171 | 2.161116  |
| 4                | 6                | 0              | 1.839741                | -0.155346 | 0.981637  |
| 5                | 7                | 0              | 1.090635                | 0.511204  | -0.167670 |
| 6                | 1                | 0              | -1.006944               | 0.653190  | -0.534821 |
| 7                | 1                | 0              | -1.102447               | 0.827919  | 1.876571  |
| 8                | 1                | 0              | 0.998089                | -0.999953 | 2.782674  |
| 9                | 1                | 0              | 2.063419                | -1.173561 | 0.675694  |
| 10               | 1                | 0              | 1.046699                | 0.751537  | 2.797301  |
| 11               | 1                | 0              | -1.160881               | -0.921635 | 1.782622  |
| 12               | 1                | 0              | -0.360738               | -0.992650 | -0.428168 |
| 13               | 1                | 0              | 2.783467                | 0.361012  | 1.141750  |
| 14               | 6                | 0              | 1.662011                | 0.202700  | -1.552890 |
| 15               | 1                | 0              | 0.987344                | 0.704233  | -2.252233 |
| 16               | 1                | 0              | 2.626638                | 0.707507  | -1.596659 |
| 17               | 6                | 0              | 1.129262                | 2.007186  | 0.009906  |
| 18               | 1                | 0              | 2.170395                | 2.328207  | -0.013329 |
| 19               | 1                | 0              | 0.565298                | 2.465304  | -0.801927 |
| 20               | 1                | 0              | 0.678049                | 2.269643  | 0.964354  |
| 21               | 6                | 0              | 1.833036                | -1.265641 | -1.927114 |
| 22               | 1                | 0              | 0.876788                | -1.800213 | -1.901596 |
| 23               | 1                | 0              | 2.517988                | -1.762493 | -1.237319 |
| 24               | 6                | 0              | 2.424119                | -1.368260 | -3.345171 |
| 25               | 1                | 0              | 3.378078                | -0.833297 | -3.365741 |
| 26               | 1                | 0              | 1.760695                | -0.866023 | -4.060376 |
| 27               | 6                | 0              | 2.639976                | -2.821482 | -3.774971 |
| 28               | 1                | 0              | 1.698452                | -3.380290 | -3.786309 |
| 29               | 1                | 0              | 3.067790                | -2.870341 | -4.779258 |
| 30               | 1                | 0              | 3.327110                | -3.331489 | -3.094814 |
| 31               | 8                | 0              | 4.371893                | 2.265544  | 0.066149  |
| 32               | 16               | 0              | 5.247938                | 1.164297  | -0.361173 |
| 33               | 8                | 0              | 5.063931                | 0.645688  | -1.721551 |
| 34               | 7                | 0              | 5.247333                | 0.065766  | 0.798602  |
| 35               | 16               | 0              | 5.508455                | -1.521582 | 0.556550  |
| 36               | 8                | 0              | 6.685590                | -1.876836 | -0.225139 |
| 37               | 8                | 0              | 4.250260                | -2.239676 | 0.298954  |
| 38               | 6                | 0              | 5.923503                | -1.937145 | 2.352383  |
| 39               | 9                | 0              | 6.150515                | -3.252584 | 2.435854  |
| 40               | 9                | 0              | 7.011155                | -1.285640 | 2.759170  |
| 41               | 9                | 0              | 4.903052                | -1.631561 | 3.166028  |
| 42               | 6                | 0              | 6.977683                | 1.928145  | -0.338324 |
| 43               | 9                | 0              | 7.032011                | 2.914865  | -1.240973 |
| 44               | 9                | 0              | 7.896723                | 1.014061  | -0.638253 |
| 45               | 9                | 0              | 7.242643                | 2.434624  | 0.868519  |

Total Energy (a.u.) = **-2237.36660839**; NIMAG = **0**

### Emim[NTf<sub>2</sub>]

| Center<br>Number | Atomic<br>Number | Atomic<br>Type | Coordinates (Angstroms) |           |           |
|------------------|------------------|----------------|-------------------------|-----------|-----------|
|                  |                  |                | X                       | Y         | Z         |
| 1                | 6                | 0              | -0.184401               | 0.183281  | 0.540862  |
| 2                | 6                | 0              | 0.236272                | 0.067929  | 2.708534  |
| 3                | 6                | 0              | 1.363115                | 0.508303  | 2.087427  |
| 4                | 7                | 0              | 1.080537                | 0.575030  | 0.736403  |
| 5                | 1                | 0              | -0.683346               | 0.127227  | -0.427431 |
| 6                | 1                | 0              | 0.032268                | -0.109714 | 3.750086  |
| 7                | 1                | 0              | 2.324178                | 0.785244  | 2.484766  |
| 8                | 6                | 0              | 2.015951                | 0.983786  | -0.322451 |
| 9                | 1                | 0              | 2.595935                | 1.833682  | 0.035428  |
| 10               | 1                | 0              | 2.681976                | 0.153987  | -0.562252 |
| 11               | 1                | 0              | 1.440956                | 1.281517  | -1.198659 |
| 12               | 7                | 0              | -0.718196               | -0.127457 | 1.727986  |
| 13               | 6                | 0              | -2.096501               | -0.624525 | 1.948228  |
| 14               | 6                | 0              | -2.124301               | -2.115485 | 2.265615  |
| 15               | 1                | 0              | -2.653044               | -0.424984 | 1.034174  |
| 16               | 1                | 0              | -2.520063               | -0.029244 | 2.759673  |
| 17               | 1                | 0              | -1.722100               | -2.693403 | 1.431941  |
| 18               | 1                | 0              | -1.562567               | -2.355070 | 3.172395  |
| 19               | 1                | 0              | -3.160603               | -2.425032 | 2.415257  |
| 20               | 8                | 0              | -0.091643               | 2.084147  | -2.433898 |
| 21               | 16               | 0              | -1.264620               | 1.465455  | -3.066245 |
| 22               | 8                | 0              | -2.468334               | 2.253958  | -3.270174 |
| 23               | 7                | 0              | -1.460698               | 0.051075  | -2.299198 |
| 24               | 16               | 0              | -2.781997               | -0.895738 | -2.337977 |
| 25               | 8                | 0              | -3.830785               | -0.548263 | -3.282045 |
| 26               | 8                | 0              | -3.130162               | -1.227168 | -0.949703 |
| 27               | 6                | 0              | -2.014547               | -2.503571 | -2.976282 |
| 28               | 9                | 0              | -2.953360               | -3.453138 | -3.014421 |
| 29               | 9                | 0              | -1.511782               | -2.342464 | -4.200835 |
| 30               | 9                | 0              | -1.030059               | -2.912900 | -2.159545 |
| 31               | 6                | 0              | -0.644083               | 1.025189  | -4.800932 |
| 32               | 9                | 0              | -0.350948               | 2.150280  | -5.459113 |
| 33               | 9                | 0              | -1.569744               | 0.351502  | -5.481141 |
| 34               | 9                | 0              | 0.464351                | 0.276541  | -4.719204 |

Total Energy (a.u.) = **-2172.36802449**; NIMAG = **0**

## Hbim[NTf<sub>2</sub>]

| Center<br>Number | Atomic<br>Number | Atomic<br>Type | Coordinates (Angstroms) |           |           |
|------------------|------------------|----------------|-------------------------|-----------|-----------|
|                  |                  |                | X                       | Y         | Z         |
| 1                | 6                | 0              | 1.144206                | -1.442512 | 0.873114  |
| 2                | 6                | 0              | 0.748720                | -0.892854 | 2.054600  |
| 3                | 6                | 0              | 2.678072                | 0.026463  | 1.478470  |
| 4                | 1                | 0              | 0.676580                | -2.185064 | 0.250483  |
| 5                | 1                | 0              | -0.126226               | -1.066975 | 2.656104  |
| 6                | 1                | 0              | 3.561904                | 0.652623  | 1.478633  |
| 7                | 7                | 0              | 2.343968                | -0.856519 | 0.539361  |
| 8                | 7                | 0              | 1.720741                | 0.027199  | 2.414487  |
| 9                | 1                | 0              | 2.908614                | -1.040358 | -0.320465 |
| 10               | 6                | 0              | 1.741986                | 0.849075  | 3.637724  |
| 11               | 1                | 0              | 2.450766                | 1.658769  | 3.457405  |
| 12               | 1                | 0              | 0.750892                | 1.294982  | 3.749356  |
| 13               | 6                | 0              | 2.131721                | 0.046563  | 4.881134  |
| 14               | 1                | 0              | 3.115430                | -0.406722 | 4.718340  |
| 15               | 1                | 0              | 1.423275                | -0.777541 | 5.022975  |
| 16               | 6                | 0              | 2.163557                | 0.923028  | 6.139153  |
| 17               | 1                | 0              | 2.875772                | 1.742419  | 5.990391  |
| 18               | 1                | 0              | 1.181961                | 1.390143  | 6.282974  |
| 19               | 6                | 0              | 2.544059                | 0.135795  | 7.396140  |
| 20               | 1                | 0              | 3.535184                | -0.315758 | 7.295283  |
| 21               | 1                | 0              | 2.563004                | 0.785056  | 8.274548  |
| 22               | 1                | 0              | 1.828850                | -0.668652 | 7.592236  |
| 23               | 8                | 0              | 5.013827                | 2.113667  | 1.212347  |
| 24               | 16               | 0              | 5.629720                | 1.776923  | -0.079807 |
| 25               | 8                | 0              | 5.486752                | 2.687830  | -1.202509 |
| 26               | 7                | 0              | 5.215883                | 0.235157  | -0.343902 |
| 27               | 16               | 0              | 5.127722                | -0.557111 | -1.740939 |
| 28               | 8                | 0              | 5.529146                | 0.112571  | -2.964233 |
| 29               | 8                | 0              | 3.829842                | -1.277555 | -1.719611 |
| 30               | 6                | 0              | 6.373004                | -1.955045 | -1.467292 |
| 31               | 9                | 0              | 6.343482                | -2.779035 | -2.516800 |
| 32               | 9                | 0              | 7.604985                | -1.463153 | -1.334075 |
| 33               | 9                | 0              | 6.063088                | -2.649585 | -0.366218 |
| 34               | 6                | 0              | 7.481628                | 1.722880  | 0.300722  |
| 35               | 9                | 0              | 7.883453                | 2.932404  | 0.699047  |
| 36               | 9                | 0              | 8.165747                | 1.373034  | -0.788737 |
| 37               | 9                | 0              | 7.736321                | 0.842059  | 1.274043  |

Total Energy (a.u.) = **-2211.70401370**; NIMAG = **0**

**Omin[NTf<sub>2</sub>]**

| Center<br>Number | Atomic<br>Number | Atomic<br>Type | Coordinates (Angstroms) |           |           |
|------------------|------------------|----------------|-------------------------|-----------|-----------|
|                  |                  |                | X                       | Y         | Z         |
| 1                | 6                | 0              | -0.075471               | 0.117960  | 0.394364  |
| 2                | 6                | 0              | -0.013139               | 0.004961  | 2.600925  |
| 3                | 6                | 0              | 1.267817                | 0.088852  | 2.150937  |
| 4                | 7                | 0              | 1.207836                | 0.160173  | 0.772110  |
| 5                | 1                | 0              | -0.428611               | 0.145004  | -0.636845 |
| 6                | 1                | 0              | -0.404021               | -0.055979 | 3.601662  |
| 7                | 1                | 0              | 2.201868                | 0.114356  | 2.684884  |
| 8                | 6                | 0              | 2.356545                | 0.244823  | -0.142007 |
| 9                | 1                | 0              | 3.095979                | 0.918345  | 0.289697  |
| 10               | 1                | 0              | 2.790891                | -0.746518 | -0.277180 |
| 11               | 1                | 0              | 2.013269                | 0.647377  | -1.094410 |
| 12               | 7                | 0              | -0.836338               | 0.026889  | 1.490936  |
| 13               | 6                | 0              | -2.313243               | -0.070354 | 1.502728  |
| 14               | 6                | 0              | -2.802195               | -1.501612 | 1.728016  |
| 15               | 1                | 0              | -2.661844               | 0.293530  | 0.537329  |
| 16               | 1                | 0              | -2.668984               | 0.604443  | 2.284819  |
| 17               | 6                | 0              | -4.333244               | -1.574243 | 1.708565  |
| 18               | 1                | 0              | -2.396247               | -2.135934 | 0.934402  |
| 19               | 1                | 0              | -2.419599               | -1.883518 | 2.682560  |
| 20               | 6                | 0              | -4.867016               | -2.996191 | 1.917120  |
| 21               | 1                | 0              | -4.742558               | -0.916139 | 2.486358  |
| 22               | 1                | 0              | -4.691038               | -1.188366 | 0.748252  |
| 23               | 1                | 0              | -4.455347               | -3.651550 | 1.139886  |
| 24               | 6                | 0              | -6.397259               | -3.076492 | 1.887881  |
| 25               | 1                | 0              | -6.759100               | -2.684970 | 0.929125  |
| 26               | 1                | 0              | -6.809677               | -2.416223 | 2.662007  |
| 27               | 1                | 0              | -4.501318               | -3.388022 | 2.875493  |
| 28               | 6                | 0              | -6.940275               | -4.495141 | 2.092695  |
| 29               | 1                | 0              | -6.529028               | -5.155466 | 1.318274  |
| 30               | 1                | 0              | -6.577423               | -4.888681 | 3.051553  |
| 31               | 6                | 0              | -8.470670               | -4.576527 | 2.062682  |
| 32               | 1                | 0              | -8.833156               | -4.186060 | 1.104247  |
| 33               | 1                | 0              | -8.882264               | -3.915476 | 2.835217  |
| 34               | 6                | 0              | -9.005302               | -5.996687 | 2.269461  |
| 35               | 1                | 0              | -10.098203              | -6.020168 | 2.242404  |
| 36               | 1                | 0              | -8.639693               | -6.674112 | 1.491308  |
| 37               | 1                | 0              | -8.688399               | -6.402213 | 3.235732  |
| 38               | 8                | 0              | 0.899675                | 1.808544  | -2.521873 |
| 39               | 16               | 0              | -0.283142               | 1.462829  | -3.321636 |
| 40               | 8                | 0              | -1.228430               | 2.503100  | -3.691938 |
| 41               | 7                | 0              | -0.910971               | 0.154619  | -2.599923 |
| 42               | 16               | 0              | -2.396795               | -0.461150 | -2.834180 |
| 43               | 8                | 0              | -3.179755               | 0.072579  | -3.936416 |
| 44               | 8                | 0              | -3.018915               | -0.637650 | -1.514874 |
| 45               | 6                | 0              | -1.937458               | -2.229283 | -3.327847 |
| 46               | 9                | 0              | -3.054368               | -2.950496 | -3.465132 |
| 47               | 9                | 0              | -1.267683               | -2.246423 | -4.480618 |
| 48               | 9                | 0              | -1.176277               | -2.802707 | -2.381731 |
| 49               | 6                | 0              | 0.452041                | 0.842300  | -4.953117 |
| 50               | 9                | 0              | 1.077205                | 1.852580  | -5.564210 |
| 51               | 9                | 0              | -0.501881               | 0.371667  | -5.754441 |
| 52               | 9                | 0              | 1.341720                | -0.132183 | -4.719698 |

Total Energy (a.u.) = **-2408.31548029**; NIMAG = **0**

## Mepip[TFA]

| Center<br>Number | Atomic<br>Number | Atomic<br>Type | Coordinates (Angstroms) |           |           |
|------------------|------------------|----------------|-------------------------|-----------|-----------|
|                  |                  |                | X                       | Y         | Z         |
| 1                | 6                | 0              | -0.035743               | -0.029149 | 0.089709  |
| 2                | 6                | 0              | 0.155114                | 0.069895  | 1.602606  |
| 3                | 6                | 0              | 1.640506                | 0.033955  | 1.980309  |
| 4                | 6                | 0              | 2.307874                | -1.212526 | 1.387878  |
| 5                | 6                | 0              | 2.086044                | -1.307489 | -0.120467 |
| 6                | 1                | 0              | -0.316138               | 0.994005  | 1.948830  |
| 7                | 1                | 0              | 0.391321                | 0.841971  | -0.420763 |
| 8                | 1                | 0              | -1.093800               | -0.092989 | -0.171693 |
| 9                | 1                | 0              | 2.139144                | 0.936443  | 1.604190  |
| 10               | 1                | 0              | 1.752240                | 0.042094  | 3.067500  |
| 11               | 1                | 0              | 3.385200                | -1.206692 | 1.574727  |
| 12               | 1                | 0              | 1.906876                | -2.112076 | 1.864628  |
| 13               | 1                | 0              | 2.578646                | -0.481103 | -0.645809 |
| 14               | 1                | 0              | 2.454844                | -2.254507 | -0.515735 |
| 15               | 1                | 0              | -0.372590               | -0.760254 | 2.082632  |
| 16               | 7                | 0              | 0.626137                | -1.252408 | -0.459430 |
| 17               | 1                | 0              | 0.142548                | -2.155787 | 0.014327  |
| 18               | 6                | 0              | 0.411487                | -1.398008 | -1.921580 |
| 19               | 1                | 0              | 0.820674                | -2.359895 | -2.228485 |
| 20               | 1                | 0              | -0.659358               | -1.380727 | -2.124774 |
| 21               | 1                | 0              | 0.901890                | -0.580861 | -2.455344 |
| 22               | 9                | 0              | 0.108340                | -6.773220 | 0.131295  |
| 23               | 6                | 0              | -0.475100               | -5.689284 | 0.664262  |
| 24               | 6                | 0              | 0.106894                | -4.354566 | 0.102642  |
| 25               | 9                | 0              | -0.305849               | -5.760119 | 2.006582  |
| 26               | 9                | 0              | -1.802363               | -5.785394 | 0.421383  |
| 27               | 8                | 0              | 1.032359                | -4.410788 | -0.703469 |
| 28               | 8                | 0              | -0.469743               | -3.323167 | 0.575455  |

Total Energy (a.u.) = **-818.2888222**; NIMAG = **0**

**Cartesian coordinates, energy and number of imaginary frequencies for the TS---Cation/Anion complexes structures for reaction acrolein-CP, optimized at the B3LYP/6-311+G(d,p) level of theory**

**TS1-Hbim<sup>+</sup>**

| Center Number | Atomic Number | Atomic Type | Coordinates (Angstroms) |            |           |
|---------------|---------------|-------------|-------------------------|------------|-----------|
|               |               |             | X                       | Y          | Z         |
| 1             | 6             | 0           | -0.048284               | 0.077248   | -0.812641 |
| 2             | 6             | 0           | 0.202058                | 0.702127   | 0.432187  |
| 3             | 6             | 0           | 1.570467                | 0.989505   | 0.551671  |
| 4             | 6             | 0           | 2.155814                | 0.862290   | -0.843745 |
| 5             | 6             | 0           | 1.114587                | 0.045997   | -1.539718 |
| 6             | 1             | 0           | -0.997008               | -0.341810  | -1.117696 |
| 7             | 1             | 0           | -0.536999               | 0.864858   | 1.205526  |
| 8             | 1             | 0           | 1.941127                | 1.717808   | 1.263103  |
| 9             | 1             | 0           | 2.163217                | 1.865977   | -1.296715 |
| 10            | 1             | 0           | 3.173370                | 0.479686   | -0.911850 |
| 11            | 1             | 0           | 1.240063                | -0.386438  | -2.523422 |
| 12            | 1             | 0           | 1.640298                | -0.725894  | 2.265824  |
| 13            | 6             | 0           | 2.307449                | -0.677661  | 1.414539  |
| 14            | 6             | 0           | 2.257928                | -1.735678  | 0.493988  |
| 15            | 1             | 0           | 3.273137                | -0.231543  | 1.624286  |
| 16            | 6             | 0           | 1.151268                | -2.607570  | 0.435408  |
| 17            | 1             | 0           | 3.081277                | -1.927611  | -0.182510 |
| 18            | 8             | 0           | 0.125493                | -2.500444  | 1.159624  |
| 19            | 1             | 0           | 1.206858                | -3.433303  | -0.291389 |
| 20            | 1             | 0           | -4.380024               | -6.125688  | 1.076413  |
| 21            | 6             | 0           | -3.496183               | -5.581041  | 1.360689  |
| 22            | 6             | 0           | -2.762485               | -4.651208  | 0.685513  |
| 23            | 7             | 0           | -2.897885               | -5.746024  | 2.596771  |
| 24            | 1             | 0           | -2.897729               | -4.237872  | -0.299007 |
| 25            | 7             | 0           | -1.730309               | -4.264888  | 1.508888  |
| 26            | 6             | 0           | -1.831547               | -4.936295  | 2.652804  |
| 27            | 6             | 0           | -3.328591               | -6.687299  | 3.651621  |
| 28            | 1             | 0           | -0.955827               | -3.530886  | 1.294043  |
| 29            | 1             | 0           | -1.167663               | -4.841604  | 3.495912  |
| 30            | 1             | 0           | -2.866582               | -6.352516  | 4.582178  |
| 31            | 1             | 0           | -4.408712               | -6.573186  | 3.764082  |
| 32            | 6             | 0           | -2.951882               | -8.137640  | 3.341248  |
| 33            | 1             | 0           | -1.866434               | -8.206887  | 3.208827  |
| 34            | 1             | 0           | -3.405205               | -8.437242  | 2.389836  |
| 35            | 6             | 0           | -3.404435               | -9.094006  | 4.452589  |
| 36            | 1             | 0           | -2.954386               | -8.785299  | 5.403335  |
| 37            | 1             | 0           | -4.489391               | -9.010618  | 4.584114  |
| 38            | 6             | 0           | -3.034534               | -10.550819 | 4.161425  |
| 39            | 1             | 0           | -1.952545               | -10.673427 | 4.058751  |
| 40            | 1             | 0           | -3.366971               | -11.205485 | 4.969590  |
| 41            | 1             | 0           | -3.500970               | -10.902468 | 3.236721  |

Total Energy (a.u.) = **-770.107672151**; NIMAG = **1**,  $\nu_i$  (cm<sup>-1</sup>) = **328i**

**TS1-Emim<sup>+</sup>**

| Center<br>Number | Atomic<br>Number | Atomic<br>Type | Coordinates (Angstroms) |           |           |
|------------------|------------------|----------------|-------------------------|-----------|-----------|
|                  |                  |                | X                       | Y         | Z         |
| 1                | 6                | 0              | -3.009453               | 1.255047  | -1.198204 |
| 2                | 6                | 0              | -3.234726               | -0.086626 | -1.567397 |
| 3                | 6                | 0              | -4.210840               | -0.651278 | -0.723837 |
| 4                | 6                | 0              | -4.916034               | 0.519117  | -0.059302 |
| 5                | 6                | 0              | -3.890787               | 1.599483  | -0.198378 |
| 6                | 1                | 0              | -2.230570               | 1.888714  | -1.599088 |
| 7                | 1                | 0              | -2.677685               | -0.627221 | -2.321263 |
| 8                | 1                | 0              | -4.744039               | -1.554551 | -0.996921 |
| 9                | 1                | 0              | -5.780217               | 0.787516  | -0.686890 |
| 10               | 1                | 0              | -5.293075               | 0.350914  | 0.948141  |
| 11               | 1                | 0              | -3.948613               | 2.560003  | 0.295728  |
| 12               | 1                | 0              | -2.427212               | -1.923373 | 0.296008  |
| 13               | 6                | 0              | -3.153887               | -1.320652 | 0.826528  |
| 14               | 6                | 0              | -2.670997               | -0.220037 | 1.552523  |
| 15               | 1                | 0              | -3.973086               | -1.888639 | 1.253811  |
| 16               | 6                | 0              | -1.377637               | 0.325587  | 1.322521  |
| 17               | 1                | 0              | -3.258722               | 0.223601  | 2.346729  |
| 18               | 8                | 0              | -0.555298               | -0.097737 | 0.484067  |
| 19               | 1                | 0              | -1.103254               | 1.190683  | 1.951830  |
| 20               | 1                | 0              | 4.241650                | 3.625808  | 0.694096  |
| 21               | 6                | 0              | 4.208110                | 2.539150  | 0.795556  |
| 22               | 6                | 0              | 3.521339                | 1.942414  | -0.428973 |
| 23               | 1                | 0              | 3.663932                | 2.298431  | 1.711110  |
| 24               | 1                | 0              | 5.234966                | 2.181590  | 0.896620  |
| 25               | 7                | 0              | 3.429421                | 0.467445  | -0.364526 |
| 26               | 1                | 0              | 2.500671                | 2.311948  | -0.531054 |
| 27               | 1                | 0              | 4.055373                | 2.190666  | -1.347924 |
| 28               | 6                | 0              | 2.317258                | -0.228704 | -0.101470 |
| 29               | 6                | 0              | 4.479692                | -0.418612 | -0.529495 |
| 30               | 7                | 0              | 2.626174                | -1.530022 | -0.096246 |
| 31               | 1                | 0              | 1.314322                | 0.155672  | 0.088758  |
| 32               | 6                | 0              | 3.975562                | -1.670591 | -0.362665 |
| 33               | 1                | 0              | 5.479911                | -0.090453 | -0.754526 |
| 34               | 6                | 0              | 1.668863                | -2.617626 | 0.153184  |
| 35               | 1                | 0              | 4.454201                | -2.633521 | -0.415851 |
| 36               | 1                | 0              | 1.656704                | -3.291175 | -0.703572 |
| 37               | 1                | 0              | 1.964662                | -3.162838 | 1.049513  |
| 38               | 1                | 0              | 0.684520                | -2.173872 | 0.294061  |

Total Energy (a.u.) = **-730.768885465**; NIMAG = **1**,  $v_i$  (cm<sup>-1</sup>) = **362i**

**TS1-Bmim<sup>+</sup>**

| Center<br>Number | Atomic<br>Number | Atomic<br>Type | Coordinates (Angstroms) |           |           |
|------------------|------------------|----------------|-------------------------|-----------|-----------|
|                  |                  |                | X                       | Y         | Z         |
| 1                | 6                | 0              | 0.287137                | 0.444791  | 0.496582  |
| 2                | 6                | 0              | 0.719200                | 0.377425  | 1.836650  |
| 3                | 6                | 0              | 2.114601                | 0.190524  | 1.874163  |
| 4                | 6                | 0              | 2.623426                | 0.567911  | 0.492931  |
| 5                | 6                | 0              | 1.385896                | 0.405888  | -0.331830 |
| 6                | 1                | 0              | -0.745029               | 0.465159  | 0.175429  |
| 7                | 1                | 0              | 0.068846                | 0.375788  | 2.701451  |
| 8                | 1                | 0              | 2.691874                | 0.397349  | 2.767897  |
| 9                | 1                | 0              | 2.880987                | 1.638345  | 0.513675  |
| 10               | 1                | 0              | 3.503042                | 0.034288  | 0.136847  |
| 11               | 1                | 0              | 1.368525                | 0.428256  | -1.413158 |
| 12               | 1                | 0              | 1.678673                | -2.077457 | 2.589447  |
| 13               | 6                | 0              | 2.322804                | -1.788970 | 1.768113  |
| 14               | 6                | 0              | 1.954112                | -2.212483 | 0.481367  |
| 15               | 1                | 0              | 3.378859                | -1.781010 | 2.015093  |
| 16               | 6                | 0              | 0.637396                | -2.661712 | 0.183536  |
| 17               | 1                | 0              | 2.681316                | -2.252995 | -0.320275 |
| 18               | 8                | 0              | -0.304972               | -2.726028 | 0.999052  |
| 19               | 1                | 0              | 0.463390                | -2.975406 | -0.861112 |
| 20               | 1                | 0              | -5.550269               | -5.641421 | -4.606268 |
| 21               | 6                | 0              | -5.179142               | -5.966996 | -3.632303 |
| 22               | 6                | 0              | -5.137611               | -4.797295 | -2.645296 |
| 23               | 1                | 0              | -4.184397               | -6.396188 | -3.782536 |
| 24               | 1                | 0              | -5.837762               | -6.764378 | -3.276470 |
| 25               | 6                | 0              | -4.613988               | -5.210156 | -1.263295 |
| 26               | 1                | 0              | -6.141665               | -4.370001 | -2.541436 |
| 27               | 1                | 0              | -4.503620               | -3.999503 | -3.049308 |
| 28               | 6                | 0              | -4.588792               | -4.029743 | -0.290085 |
| 29               | 1                | 0              | -3.602819               | -5.621804 | -1.354958 |
| 30               | 1                | 0              | -5.243979               | -6.008285 | -0.855261 |
| 31               | 7                | 0              | -4.069435               | -4.400151 | 1.043566  |
| 32               | 1                | 0              | -3.949654               | -3.227498 | -0.662050 |
| 33               | 1                | 0              | -5.588204               | -3.614149 | -0.144344 |
| 34               | 6                | 0              | -2.854208               | -4.095573 | 1.513113  |
| 35               | 6                | 0              | -4.736779               | -5.152026 | 1.994486  |
| 36               | 7                | 0              | -2.727795               | -4.627433 | 2.734035  |
| 37               | 1                | 0              | -2.070012               | -3.519531 | 1.021029  |
| 38               | 6                | 0              | -3.896462               | -5.292882 | 3.054659  |
| 39               | 1                | 0              | -5.739511               | -5.512606 | 1.842379  |
| 40               | 6                | 0              | -1.530855               | -4.509333 | 3.579214  |
| 41               | 1                | 0              | -4.031189               | -5.797639 | 3.996015  |
| 42               | 1                | 0              | -1.801163               | -4.038667 | 4.524390  |
| 43               | 1                | 0              | -1.117717               | -5.501034 | 3.763758  |
| 44               | 1                | 0              | -0.804152               | -3.894974 | 3.049685  |

Total Energy (a.u.) = **-809.418938327** ; NIMAG = **1** ,  $v_i$  (cm<sup>-1</sup>) = **358i**



**TS1-Omim<sup>+</sup>**

| Center<br>Number | Atomic<br>Number | Atomic<br>Type | Coordinates (Angstroms) |           |           |
|------------------|------------------|----------------|-------------------------|-----------|-----------|
|                  |                  |                | X                       | Y         | Z         |
| 1                | 6                | 0              | 4.088350                | -2.182475 | -1.524192 |
| 2                | 6                | 0              | 5.220416                | -1.356647 | -1.372167 |
| 3                | 6                | 0              | 6.044421                | -1.868141 | -0.350997 |
| 4                | 6                | 0              | 5.601300                | -3.306028 | -0.137485 |
| 5                | 6                | 0              | 4.211401                | -3.270742 | -0.689902 |
| 6                | 1                | 0              | 3.236288                | -1.961258 | -2.151807 |
| 7                | 1                | 0              | 5.384709                | -0.423007 | -1.893792 |
| 8                | 1                | 0              | 7.083764                | -1.574695 | -0.259074 |
| 9                | 1                | 0              | 6.212616                | -3.944167 | -0.794466 |
| 10               | 1                | 0              | 5.700013                | -3.699331 | 0.872810  |
| 11               | 1                | 0              | 3.491987                | -4.070666 | -0.577394 |
| 12               | 1                | 0              | 5.315347                | -0.005356 | 1.006853  |
| 13               | 6                | 0              | 5.296274                | -1.046677 | 1.303555  |
| 14               | 6                | 0              | 4.040200                | -1.619240 | 1.559816  |
| 15               | 1                | 0              | 6.126704                | -1.343599 | 1.934842  |
| 16               | 6                | 0              | 2.832651                | -1.021008 | 1.103259  |
| 17               | 1                | 0              | 3.949545                | -2.518893 | 2.156053  |
| 18               | 8                | 0              | 2.755505                | 0.040607  | 0.451938  |
| 19               | 1                | 0              | 1.903515                | -1.559311 | 1.362369  |
| 20               | 1                | 0              | -8.196644               | -1.832239 | -1.035148 |
| 21               | 6                | 0              | -7.786837               | -2.260715 | -0.112568 |
| 22               | 6                | 0              | -6.772238               | -1.282522 | 0.490247  |
| 23               | 1                | 0              | -7.268651               | -3.180932 | -0.408436 |
| 24               | 6                | 0              | -8.933039               | -2.605562 | 0.842464  |
| 25               | 6                | 0              | -5.617929               | -0.937233 | -0.457722 |
| 26               | 1                | 0              | -6.365726               | -1.709403 | 1.416269  |
| 27               | 1                | 0              | -7.290548               | -0.360221 | 0.782601  |
| 28               | 1                | 0              | -9.637938               | -3.302345 | 0.381882  |
| 29               | 1                | 0              | -8.558626               | -3.070771 | 1.759623  |
| 30               | 1                | 0              | -9.492697               | -1.710165 | 1.130116  |
| 31               | 6                | 0              | -4.604888               | 0.041406  | 0.146721  |
| 32               | 1                | 0              | -5.100119               | -1.860221 | -0.748447 |
| 33               | 1                | 0              | -6.024827               | -0.511377 | -1.383648 |
| 34               | 6                | 0              | -3.447766               | 0.376754  | -0.802750 |
| 35               | 1                | 0              | -4.200225               | -0.381694 | 1.074688  |
| 36               | 1                | 0              | -5.120012               | 0.967259  | 0.431474  |
| 37               | 6                | 0              | -2.436004               | 1.353980  | -0.191531 |
| 38               | 1                | 0              | -3.851192               | 0.801506  | -1.730236 |
| 39               | 1                | 0              | -2.932889               | -0.549348 | -1.087247 |
| 40               | 6                | 0              | -1.291526               | 1.661281  | -1.159991 |
| 41               | 1                | 0              | -2.020917               | 0.934694  | 0.731574  |
| 42               | 1                | 0              | -2.942114               | 2.285717  | 0.084112  |
| 43               | 7                | 0              | -0.297636               | 2.597986  | -0.593495 |
| 44               | 1                | 0              | -0.748685               | 0.753447  | -1.427495 |
| 45               | 1                | 0              | -1.663290               | 2.107526  | -2.084755 |
| 46               | 6                | 0              | 0.894451                | 2.253296  | -0.093522 |
| 47               | 6                | 0              | -0.462177               | 3.963894  | -0.446813 |
| 48               | 7                | 0              | 1.495525                | 3.357555  | 0.363843  |
| 49               | 1                | 0              | 1.336507                | 1.257761  | -0.039962 |
| 50               | 6                | 0              | 0.662610                | 4.440459  | 0.151220  |
| 51               | 1                | 0              | -1.348982               | 4.474585  | -0.780720 |
| 52               | 6                | 0              | 2.828194                | 3.390676  | 0.982812  |
| 53               | 1                | 0              | 0.937918                | 5.442219  | 0.433647  |
| 54               | 1                | 0              | 3.476601                | 4.053360  | 0.409734  |
| 55               | 1                | 0              | 2.743415                | 3.750617  | 2.008196  |
| 56               | 1                | 0              | 3.228709                | 2.378131  | 0.975128  |

Total Energy (a.u.) = **-966.716990408** ; NIMAG = **1** ,  $\nu_i$  (cm<sup>-1</sup>) = **359i**

**TS1-Bm<sub>2</sub>im<sup>+</sup>**

| Center<br>Number | Atomic<br>Number | Atomic<br>Type | Coordinates (Angstroms) |           |           |
|------------------|------------------|----------------|-------------------------|-----------|-----------|
|                  |                  |                | X                       | Y         | Z         |
| 1                | 6                | 0              | 4.522558                | -0.057896 | 1.395844  |
| 2                | 6                | 0              | 4.118920                | -1.389915 | 1.613345  |
| 3                | 6                | 0              | 4.568475                | -2.198908 | 0.550458  |
| 4                | 6                | 0              | 5.655415                | -1.399724 | -0.149630 |
| 5                | 6                | 0              | 5.305809                | -0.004974 | 0.264136  |
| 6                | 1                | 0              | 4.212046                | 0.791713  | 1.987987  |
| 7                | 1                | 0              | 3.480598                | -1.723338 | 2.420820  |
| 8                | 1                | 0              | 4.629724                | -3.277051 | 0.645068  |
| 9                | 1                | 0              | 6.616877                | -1.662986 | 0.318128  |
| 10               | 1                | 0              | 5.764460                | -1.563448 | -1.220427 |
| 11               | 1                | 0              | 5.749533                | 0.885210  | -0.160927 |
| 12               | 1                | 0              | 2.278444                | -2.320424 | -0.196936 |
| 13               | 6                | 0              | 3.126944                | -2.038974 | -0.808499 |
| 14               | 6                | 0              | 3.139095                | -0.733204 | -1.324456 |
| 15               | 1                | 0              | 3.502873                | -2.836764 | -1.439976 |
| 16               | 6                | 0              | 2.316455                | 0.295886  | -0.778411 |
| 17               | 1                | 0              | 3.745747                | -0.478204 | -2.184856 |
| 18               | 8                | 0              | 1.529442                | 0.155109  | 0.175555  |
| 19               | 1                | 0              | -7.590851               | -3.281315 | -0.510880 |
| 20               | 6                | 0              | -7.008637               | -2.558480 | 0.064289  |
| 21               | 6                | 0              | -5.912186               | -1.929192 | -0.799443 |
| 22               | 1                | 0              | -6.584766               | -3.083874 | 0.924989  |
| 23               | 1                | 0              | -7.700945               | -1.800850 | 0.442358  |
| 24               | 6                | 0              | -5.069998               | -0.903421 | -0.029924 |
| 25               | 1                | 0              | -6.365816               | -1.444455 | -1.671575 |
| 26               | 1                | 0              | -5.257778               | -2.716599 | -1.191485 |
| 27               | 6                | 0              | -3.977769               | -0.290845 | -0.910187 |
| 28               | 1                | 0              | -4.611007               | -1.381306 | 0.842855  |
| 29               | 1                | 0              | -5.714872               | -0.104599 | 0.352529  |
| 30               | 7                | 0              | -3.169911               | 0.727455  | -0.207043 |
| 31               | 1                | 0              | -3.297584               | -1.054156 | -1.290379 |
| 32               | 1                | 0              | -4.410933               | 0.208783  | -1.778256 |
| 33               | 6                | 0              | -2.091680               | 0.505680  | 0.571266  |
| 34               | 6                | 0              | -3.447998               | 2.083674  | -0.218193 |
| 35               | 7                | 0              | -1.684154               | 1.698249  | 1.044073  |
| 36               | 6                | 0              | -1.450048               | -0.796454 | 0.880769  |
| 37               | 6                | 0              | -2.519018               | 2.688917  | 0.563204  |
| 38               | 1                | 0              | -4.267728               | 2.493156  | -0.782493 |
| 39               | 6                | 0              | -0.521451               | 1.908800  | 1.920571  |
| 40               | 1                | 0              | -1.591158               | -1.049868 | 1.936256  |
| 41               | 1                | 0              | -1.882640               | -1.596339 | 0.282935  |
| 42               | 1                | 0              | -0.375539               | -0.738700 | 0.678058  |
| 43               | 1                | 0              | -2.374811               | 3.726425  | 0.809783  |
| 44               | 1                | 0              | 0.360282                | 1.457615  | 1.460220  |
| 45               | 1                | 0              | -0.376721               | 2.981168  | 2.033380  |
| 46               | 1                | 0              | -0.713346               | 1.469624  | 2.900627  |
| 47               | 1                | 0              | 2.406872                | 1.287604  | -1.257882 |

Total Energy (a.u.) = **-848.749317682**; NIMAG = **1**,  $\nu_i$  (cm<sup>-1</sup>) = **360i**

**TS1-Bmpy<sup>+</sup>**

| Center<br>Number | Atomic<br>Number | Atomic<br>Type | Coordinates (Angstroms) |           |           |
|------------------|------------------|----------------|-------------------------|-----------|-----------|
|                  |                  |                | X                       | Y         | Z         |
| 1                | 6                | 0              | 0.329375                | -0.369798 | 1.909490  |
| 2                | 6                | 0              | 1.060383                | -1.557034 | 1.711437  |
| 3                | 6                | 0              | 1.865744                | -1.428589 | 0.562293  |
| 4                | 6                | 0              | 1.950341                | 0.062346  | 0.279591  |
| 5                | 6                | 0              | 0.719470                | 0.560415  | 0.970333  |
| 6                | 1                | 0              | -0.453293               | -0.232425 | 2.642819  |
| 7                | 1                | 0              | 0.950759                | -2.462954 | 2.293102  |
| 8                | 1                | 0              | 2.706002                | -2.088793 | 0.380656  |
| 9                | 1                | 0              | 2.825771                | 0.454148  | 0.820667  |
| 10               | 1                | 0              | 2.060735                | 0.353596  | -0.763475 |
| 11               | 1                | 0              | 0.327576                | 1.563406  | 0.868453  |
| 12               | 1                | 0              | 0.319530                | -2.921922 | -0.553146 |
| 13               | 6                | 0              | 0.651329                | -1.959515 | -0.923326 |
| 14               | 6                | 0              | -0.323163               | -0.961561 | -1.079716 |
| 15               | 1                | 0              | 1.440675                | -2.018163 | -1.664861 |
| 16               | 6                | 0              | -1.611111               | -1.054453 | -0.469299 |
| 17               | 1                | 0              | -0.147465               | -0.109003 | -1.724463 |
| 18               | 8                | 0              | -2.011862               | -1.993838 | 0.239616  |
| 19               | 1                | 0              | -2.290702               | -0.204566 | -0.667626 |
| 20               | 1                | 0              | -3.609922               | -4.540174 | -4.992409 |
| 21               | 6                | 0              | -3.592890               | -3.985329 | -4.052075 |
| 22               | 6                | 0              | -4.205499               | -4.813949 | -2.920176 |
| 23               | 1                | 0              | -2.552544               | -3.726111 | -3.836414 |
| 24               | 1                | 0              | -4.145211               | -3.054115 | -4.206747 |
| 25               | 6                | 0              | -4.184622               | -4.072593 | -1.571991 |
| 26               | 1                | 0              | -5.237350               | -5.078469 | -3.178988 |
| 27               | 1                | 0              | -3.660390               | -5.759622 | -2.820940 |
| 28               | 6                | 0              | -4.868614               | -4.915405 | -0.500226 |
| 29               | 1                | 0              | -3.152235               | -3.843630 | -1.297474 |
| 30               | 1                | 0              | -4.700493               | -3.114970 | -1.685662 |
| 31               | 7                | 0              | -4.737850               | -4.444266 | 0.945303  |
| 32               | 1                | 0              | -4.473752               | -5.934333 | -0.503215 |
| 33               | 1                | 0              | -5.940967               | -4.977896 | -0.696771 |
| 34               | 6                | 0              | -5.024233               | -2.963671 | 1.152623  |
| 35               | 6                | 0              | -3.319918               | -4.575696 | 1.489130  |
| 36               | 6                | 0              | -5.675990               | -5.274966 | 1.776709  |
| 37               | 6                | 0              | -4.438140               | -2.643749 | 2.530020  |
| 38               | 1                | 0              | -4.469142               | -2.431317 | 0.384717  |
| 39               | 1                | 0              | -6.094235               | -2.788064 | 1.043598  |
| 40               | 6                | 0              | -3.271067               | -3.654628 | 2.717401  |
| 41               | 1                | 0              | -3.123401               | -5.628279 | 1.691111  |
| 42               | 1                | 0              | -2.649705               | -4.206175 | 0.717236  |
| 43               | 1                | 0              | -6.699251               | -5.073362 | 1.463880  |
| 44               | 1                | 0              | -5.442620               | -6.327284 | 1.621545  |
| 45               | 1                | 0              | -5.557669               | -5.025963 | 2.828082  |
| 46               | 1                | 0              | -4.086858               | -1.613319 | 2.544934  |
| 47               | 1                | 0              | -5.184200               | -2.747509 | 3.319586  |
| 48               | 1                | 0              | -3.377460               | -4.214051 | 3.647793  |
| 49               | 1                | 0              | -2.309174               | -3.146305 | 2.738086  |

Total Energy (a.u.) = **-795.766202936**; NIMAG = **1**,  $\nu_i$  (cm<sup>-1</sup>) = **371i**

**TS1-Mepip<sup>+</sup>**

| Center<br>Number | Atomic<br>Number | Atomic<br>Type | Coordinates (Angstroms) |           |           |
|------------------|------------------|----------------|-------------------------|-----------|-----------|
|                  |                  |                | X                       | Y         | Z         |
| 1                | 6                | 0              | -0.507956               | 0.341463  | 0.206491  |
| 2                | 6                | 0              | 0.866420                | 0.223506  | 0.514948  |
| 3                | 6                | 0              | 1.488287                | 1.477234  | 0.397085  |
| 4                | 6                | 0              | 0.369623                | 2.503925  | 0.376200  |
| 5                | 6                | 0              | -0.806396               | 1.664775  | -0.007764 |
| 6                | 1                | 0              | -1.200170               | -0.484070 | 0.116158  |
| 7                | 1                | 0              | 1.378743                | -0.704211 | 0.733724  |
| 8                | 1                | 0              | 2.445891                | 1.685268  | 0.859380  |
| 9                | 1                | 0              | 0.216945                | 2.850797  | 1.410261  |
| 10               | 1                | 0              | 0.533110                | 3.391742  | -0.232728 |
| 11               | 1                | 0              | -1.775321               | 2.063538  | -0.276949 |
| 12               | 1                | 0              | 2.586565                | 0.580641  | -1.580363 |
| 13               | 6                | 0              | 2.048092                | 1.518835  | -1.534177 |
| 14               | 6                | 0              | 0.905605                | 1.648671  | -2.339465 |
| 15               | 1                | 0              | 2.679586                | 2.390782  | -1.405676 |
| 16               | 6                | 0              | 0.257952                | 0.528181  | -2.906025 |
| 17               | 1                | 0              | 0.503909                | 2.624651  | -2.582128 |
| 18               | 8                | 0              | 0.612859                | -0.667756 | -2.743139 |
| 19               | 1                | 0              | -0.616240               | 0.742816  | -3.542553 |
| 20               | 1                | 0              | 0.260708                | -3.221582 | -6.341022 |
| 21               | 6                | 0              | 0.272842                | -2.369554 | -5.661217 |
| 22               | 7                | 0              | 0.309558                | -2.854621 | -4.251504 |
| 23               | 1                | 0              | -0.624584               | -1.769699 | -5.808089 |
| 24               | 1                | 0              | 1.155131                | -1.759151 | -5.848831 |
| 25               | 6                | 0              | 1.566136                | -3.642981 | -3.973876 |
| 26               | 6                | 0              | -0.928790               | -3.641988 | -3.905034 |
| 27               | 1                | 0              | 0.338214                | -1.988117 | -3.631623 |
| 28               | 6                | 0              | 1.615747                | -4.115934 | -2.523965 |
| 29               | 1                | 0              | 1.572100                | -4.487001 | -4.669833 |
| 30               | 1                | 0              | 2.406230                | -2.990241 | -4.214306 |
| 31               | 6                | 0              | -0.899159               | -4.117044 | -2.454871 |
| 32               | 1                | 0              | -1.783643               | -2.992554 | -4.100587 |
| 33               | 1                | 0              | -0.973479               | -4.486363 | -4.598978 |
| 34               | 6                | 0              | 0.367799                | -4.926279 | -2.154675 |
| 35               | 1                | 0              | 2.522578                | -4.712203 | -2.395586 |
| 36               | 1                | 0              | 1.709559                | -3.245378 | -1.866986 |
| 37               | 1                | 0              | -1.797557               | -4.713533 | -2.277454 |
| 38               | 1                | 0              | -0.957062               | -3.249250 | -1.789437 |
| 39               | 1                | 0              | 0.351859                | -5.863385 | -2.723404 |
| 40               | 1                | 0              | 0.396398                | -5.202001 | -1.098393 |

Total Energy (a.u.) = **-677.82438187**; NIMAG = **1**,  $\nu_i$  (cm<sup>-1</sup>) = **335i**

**TS1-BF<sub>4</sub><sup>-</sup>**

| Center<br>Number | Atomic<br>Number | Atomic<br>Type | Coordinates (Angstroms) |           |           |
|------------------|------------------|----------------|-------------------------|-----------|-----------|
|                  |                  |                | X                       | Y         | Z         |
| 1                | 6                | 0              | -0.568210               | -0.840321 | -0.080847 |
| 2                | 6                | 0              | -0.449992               | -0.373505 | 1.239636  |
| 3                | 6                | 0              | 0.656920                | 0.503691  | 1.333617  |
| 4                | 6                | 0              | 0.973845                | 0.922543  | -0.092277 |
| 5                | 6                | 0              | 0.383838                | -0.215616 | -0.863681 |
| 6                | 1                | 0              | -1.227799               | -1.636146 | -0.400897 |
| 7                | 1                | 0              | -1.028793               | -0.737260 | 2.078844  |
| 8                | 1                | 0              | 0.788502                | 1.205888  | 2.148813  |
| 9                | 1                | 0              | 0.398706                | 1.838984  | -0.295843 |
| 10               | 1                | 0              | 2.016044                | 1.167800  | -0.279691 |
| 11               | 1                | 0              | 0.545485                | -0.391446 | -1.919613 |
| 12               | 1                | 0              | 1.791326                | -1.215835 | 2.524301  |
| 13               | 6                | 0              | 2.151428                | -0.672445 | 1.657842  |
| 14               | 6                | 0              | 2.393168                | -1.442374 | 0.501349  |
| 15               | 1                | 0              | 2.844369                | 0.133464  | 1.878248  |
| 16               | 6                | 0              | 1.826171                | -2.746840 | 0.326145  |
| 17               | 1                | 0              | 3.071809                | -1.086399 | -0.265377 |
| 18               | 8                | 0              | 1.057922                | -3.310626 | 1.111127  |
| 19               | 1                | 0              | 2.115266                | -3.262349 | -0.616658 |
| 20               | 9                | 0              | 3.657253                | 2.293852  | 1.212154  |
| 21               | 5                | 0              | 2.947320                | 3.334038  | 1.879131  |
| 22               | 9                | 0              | 2.285453                | 2.775360  | 3.006152  |
| 23               | 9                | 0              | 1.980538                | 3.868089  | 0.994530  |
| 24               | 9                | 0              | 3.840432                | 4.334972  | 2.290381  |

Total Energy (a.u.) = **-810.802273989**; NIMAG = **1** ,  $v_i$  (cm<sup>-1</sup>) = **360i**

**TS1-PF<sub>6</sub><sup>-</sup>**

| Center Number | Atomic Number | Atomic Type | Coordinates (Angstroms) |           |           |
|---------------|---------------|-------------|-------------------------|-----------|-----------|
|               |               |             | X                       | Y         | Z         |
| 1             | 6             | 0           | 0.045513                | 0.026577  | -0.061962 |
| 2             | 6             | 0           | 0.036805                | -0.032423 | 1.342437  |
| 3             | 6             | 0           | 1.367524                | -0.042352 | 1.822004  |
| 4             | 6             | 0           | 2.224178                | 0.466965  | 0.674812  |
| 5             | 6             | 0           | 1.351516                | 0.144367  | -0.497849 |
| 6             | 1             | 0           | -0.822569               | -0.107182 | -0.693719 |
| 7             | 1             | 0           | -0.845037               | -0.188235 | 1.950279  |
| 8             | 1             | 0           | 1.626983                | 0.195886  | 2.846436  |
| 9             | 1             | 0           | 2.295836                | 1.560251  | 0.782750  |
| 10            | 1             | 0           | 3.243588                | 0.090647  | 0.654924  |
| 11            | 1             | 0           | 1.669628                | 0.194021  | -1.531305 |
| 12            | 1             | 0           | 1.048498                | -2.349246 | 2.343831  |
| 13            | 6             | 0           | 1.861509                | -1.917588 | 1.771168  |
| 14            | 6             | 0           | 1.958703                | -2.327047 | 0.426941  |
| 15            | 1             | 0           | 2.784307                | -1.777903 | 2.324055  |
| 16            | 6             | 0           | 0.858220                | -2.941765 | -0.258602 |
| 17            | 1             | 0           | 2.899440                | -2.252310 | -0.106388 |
| 18            | 8             | 0           | -0.266295               | -3.130957 | 0.211653  |
| 19            | 9             | 0           | 3.517794                | 0.107632  | 4.313484  |
| 20            | 15            | 0           | 5.006512                | 0.583059  | 3.771765  |
| 21            | 9             | 0           | 4.284588                | 1.769725  | 2.883278  |
| 22            | 9             | 0           | 6.472297                | 1.048499  | 3.208494  |
| 23            | 9             | 0           | 4.840651                | -0.451158 | 2.487776  |
| 24            | 9             | 0           | 5.145242                | 1.609040  | 5.040111  |
| 25            | 9             | 0           | 5.704920                | -0.615312 | 4.642456  |
| 26            | 1             | 0           | 1.070220                | -3.251324 | -1.305785 |

Total Energy (a.u.) = **-1327.01587534**; NIMAG = **1**,  $\nu_i$  (cm<sup>-1</sup>) = **377i**

**TS1-NTf<sub>2</sub><sup>-</sup>**

| Center<br>Number | Atomic<br>Number | Atomic<br>Type | Coordinates (Angstroms) |           |           |
|------------------|------------------|----------------|-------------------------|-----------|-----------|
|                  |                  |                | X                       | Y         | Z         |
| 1                | 6                | 0              | -0.003643               | -0.012174 | -0.025050 |
| 2                | 6                | 0              | -0.018198               | 0.010882  | 1.380458  |
| 3                | 6                | 0              | 1.309579                | 0.028081  | 1.865215  |
| 4                | 6                | 0              | 2.173451                | 0.465602  | 0.693862  |
| 5                | 6                | 0              | 1.304093                | 0.077715  | -0.461860 |
| 6                | 1                | 0              | -0.869633               | -0.180726 | -0.651222 |
| 7                | 1                | 0              | -0.901853               | -0.107945 | 1.993923  |
| 8                | 1                | 0              | 1.556810                | 0.318570  | 2.880107  |
| 9                | 1                | 0              | 2.237610                | 1.564827  | 0.731320  |
| 10               | 1                | 0              | 3.194580                | 0.091028  | 0.688115  |
| 11               | 1                | 0              | 1.628086                | 0.069261  | -1.494468 |
| 12               | 1                | 0              | 0.971789                | -2.262078 | 2.493672  |
| 13               | 6                | 0              | 1.794198                | -1.866541 | 1.909186  |
| 14               | 6                | 0              | 1.909087                | -2.333647 | 0.587706  |
| 15               | 1                | 0              | 2.709874                | -1.712347 | 2.469041  |
| 16               | 6                | 0              | 0.814421                | -2.982338 | -0.079150 |
| 17               | 1                | 0              | 2.857496                | -2.283036 | 0.065938  |
| 18               | 8                | 0              | -0.312414               | -3.153356 | 0.390503  |
| 19               | 1                | 0              | 1.036612                | -3.339331 | -1.108516 |
| 20               | 8                | 0              | 5.583616                | -0.494316 | 1.297616  |
| 21               | 16               | 0              | 5.855155                | -0.096059 | 2.679231  |
| 22               | 8                | 0              | 6.292374                | -1.104060 | 3.640270  |
| 23               | 7                | 0              | 4.645182                | 0.847672  | 3.147684  |
| 24               | 6                | 0              | 7.344885                | 1.062551  | 2.502547  |
| 25               | 16               | 0              | 4.248798                | 1.243542  | 4.661774  |
| 26               | 9                | 0              | 8.397514                | 0.373123  | 2.029630  |
| 27               | 9                | 0              | 7.690155                | 1.600881  | 3.676606  |
| 28               | 9                | 0              | 7.082338                | 2.058682  | 1.642960  |
| 29               | 8                | 0              | 5.268613                | 1.079059  | 5.694160  |
| 30               | 8                | 0              | 2.874581                | 0.827517  | 4.949400  |
| 31               | 6                | 0              | 4.101082                | 3.115185  | 4.426734  |
| 32               | 9                | 0              | 3.737457                | 3.679420  | 5.591089  |
| 33               | 9                | 0              | 5.269409                | 3.653068  | 4.051765  |
| 34               | 9                | 0              | 3.177983                | 3.430521  | 3.507856  |

Total Energy (a.u.) = **-2213.72665226**; NIMAG = **1**,  $\nu_i$  (cm<sup>-1</sup>) = **380i**

**TS1-OTf<sup>-</sup>**

| Center<br>Number | Atomic<br>Number | Atomic<br>Type | Coordinates (Angstroms) |           |           |
|------------------|------------------|----------------|-------------------------|-----------|-----------|
|                  |                  |                | X                       | Y         | Z         |
| 1                | 6                | 0              | -0.118682               | -0.593900 | -0.624500 |
| 2                | 6                | 0              | -0.317650               | 0.118962  | 0.571121  |
| 3                | 6                | 0              | 0.845051                | 0.866402  | 0.873590  |
| 4                | 6                | 0              | 1.633331                | 0.946328  | -0.422082 |
| 5                | 6                | 0              | 1.111246                | -0.250995 | -1.151100 |
| 6                | 1                | 0              | -0.780262               | -1.359378 | -1.007862 |
| 7                | 1                | 0              | -1.171836               | 0.004137  | 1.225804  |
| 8                | 1                | 0              | 0.850426                | 1.704148  | 1.559627  |
| 9                | 1                | 0              | 1.318050                | 1.866655  | -0.936302 |
| 10               | 1                | 0              | 2.712527                | 1.016500  | -0.311689 |
| 11               | 1                | 0              | 1.545147                | -0.656432 | -2.056125 |
| 12               | 1                | 0              | 1.253374                | -0.687653 | 2.628012  |
| 13               | 6                | 0              | 1.947147                | -0.370242 | 1.857348  |
| 14               | 6                | 0              | 2.399563                | -1.381790 | 0.985951  |
| 15               | 1                | 0              | 2.650551                | 0.393923  | 2.174158  |
| 16               | 6                | 0              | 1.700072                | -2.625403 | 0.848603  |
| 17               | 1                | 0              | 3.324481                | -1.266322 | 0.432417  |
| 18               | 8                | 0              | 0.647618                | -2.925042 | 1.419885  |
| 19               | 1                | 0              | 2.167570                | -3.354511 | 0.150570  |
| 20               | 8                | 0              | 2.509701                | 4.103896  | 0.269147  |
| 21               | 16               | 0              | 3.308800                | 3.997783  | 1.506083  |
| 22               | 8                | 0              | 3.537131                | 5.253285  | 2.236726  |
| 23               | 8                | 0              | 2.994320                | 2.817620  | 2.342716  |
| 24               | 6                | 0              | 5.031796                | 3.572577  | 0.845156  |
| 25               | 9                | 0              | 5.927691                | 3.415361  | 1.840062  |
| 26               | 9                | 0              | 5.020403                | 2.418286  | 0.136198  |
| 27               | 9                | 0              | 5.506740                | 4.533293  | 0.026914  |

Total Energy (a.u.) = **-1347.85036727**; NIMAG = **1**,  $\nu_i$  (cm<sup>-1</sup>) = **360i**



**TS1-TFA<sup>-</sup>**

| Center<br>Number | Atomic<br>Number | Atomic<br>Type | Coordinates (Angstroms) |           |           |
|------------------|------------------|----------------|-------------------------|-----------|-----------|
|                  |                  |                | X                       | Y         | Z         |
| 1                | 6                | 0              | 0.597346                | -0.083616 | 0.189757  |
| 2                | 6                | 0              | 1.862363                | -0.017225 | -0.418480 |
| 3                | 6                | 0              | 2.248152                | 1.338458  | -0.550940 |
| 4                | 6                | 0              | 1.355931                | 2.117249  | 0.396478  |
| 5                | 6                | 0              | 0.208864                | 1.188417  | 0.560691  |
| 6                | 1                | 0              | 0.004620                | -0.982324 | 0.294727  |
| 7                | 1                | 0              | 2.401809                | -0.862658 | -0.825515 |
| 8                | 1                | 0              | 3.289651                | 1.608250  | -0.695411 |
| 9                | 1                | 0              | 1.826804                | 2.223994  | 1.393964  |
| 10               | 1                | 0              | 1.085073                | 3.128415  | 0.093715  |
| 11               | 1                | 0              | -0.699860               | 1.473618  | 1.071680  |
| 12               | 1                | 0              | 1.974670                | 1.163481  | -2.913879 |
| 13               | 6                | 0              | 1.497590                | 1.888537  | -2.263339 |
| 14               | 6                | 0              | 0.090875                | 1.839510  | -2.212751 |
| 15               | 1                | 0              | 1.963476                | 2.869226  | -2.278427 |
| 16               | 6                | 0              | -0.610270               | 0.650596  | -2.586525 |
| 17               | 1                | 0              | -0.491844               | 2.693158  | -1.887248 |
| 18               | 8                | 0              | -0.080858               | -0.399695 | -2.969901 |
| 19               | 1                | 0              | -1.716857               | 0.705418  | -2.506018 |
| 20               | 9                | 0              | 1.669890                | 3.979655  | 5.890477  |
| 21               | 6                | 0              | 0.520260                | 3.810619  | 5.192875  |
| 22               | 6                | 0              | 0.713375                | 3.223518  | 3.736226  |
| 23               | 9                | 0              | -0.269337               | 3.009307  | 5.964103  |
| 24               | 9                | 0              | -0.086230               | 5.032056  | 5.173473  |
| 25               | 8                | 0              | -0.357119               | 3.095247  | 3.119243  |
| 26               | 8                | 0              | 1.891219                | 2.977106  | 3.419717  |

Total Energy (a.u.) = **-912.56556650**; NIMAG = **1** ,  $\nu_i$  (cm<sup>-1</sup>) = **360i**
